# Supplementary material for: Development of lipidated polycarbonates with broad-spectrum antimicrobial activity
Source: Royal Society of Chemistry journal article supplement (doi:10.1039/d2bm01995g), 2023-01-01
Supplement: d2bm01995g1.pdf [file d2bm01995g1.pdf]

## Supporting Information

# Development of lipidated polycarbonates with broad-spectrum antimicrobial activity

Ruixuan Gao, Xuming Li, Menglin Xue, Ning Shen, Minghui Wang, Jingyao Zhang, Chuanhai Cao, and Jianfeng Cai\*

[jianfengcai@usf.edu](mailto:jianfengcai@usf.edu)

Department of Chemistry, University of South Florida, Tampa, FL 33620

### Polymer Characterization

<sup>1</sup>H NMR and DP calculation for **P20** (Figure S1) is shown here as representative.<sup>1</sup> Peak f accounts for 2 protons from the initiator. Peak a accounts for 5 protons from M1 benzene ring on side chain, thus the average number of M1 per polymer chain equates to  $42.26/5 = 8.452$ . Peak d accounts for 4 protons from M2 methylene groups, therefore, the average number of M2 per polymer chain equates to  $93.44/4 = 23.36$ .

DP is calculated by summing up these values ( $8.452 + 23.36 = 32$ ) to get the average total number of monomer units per polymer chain.

$M_n$  is calculated by taking the molecular weight of each monomer and multiplying by the number of each of the relevant monomer, and adding the molecular weight of the initiator.  $M_n$  for **P20** equates to  $250.25$  (molecular weight of M1) \*  $8.452$  +  $203.19$  (molecular weight of M2) \*  $23.36$  +  $214.39$  (molecular weight of tetradecanol) =  $7076.02$  (2 significant figures).

**Table S1:** <sup>1</sup>H NMR and MALDI analysis of the synthesized polymers.

| Polymer    | $M_n^a$  | DP <sup>b</sup> | PDI <sup>c</sup> |
|------------|----------|-----------------|------------------|
| <b>P1</b>  | 4586.64  | 21              | 1.07             |
| <b>P2</b>  | 4103.56  | 19              | 1.27             |
| <b>P3</b>  | 8982.15  | 43              | 1.40             |
| <b>P4</b>  | 7845.81  | 37              | 1.21             |
| <b>P5</b>  | 15130.80 | 71              | 1.32             |
| <b>P6</b>  | 17058.28 | 79              | 1.33             |
| <b>P7</b>  | 13201.34 | 61              | 1.30             |
| <b>P8</b>  | 12705.62 | 56              | 1.30             |
| <b>P9</b>  | 8079.43  | 36              | 1.30             |
| <b>P10</b> | 15464.73 | 69              | 1.72             |
| <b>P11</b> | 8185.56  | 35              | 1.43             |
| <b>P12</b> | 8555.92  | 39              | 1.03             |
| <b>P13</b> | 14997.90 | 65              | 1.81             |
| <b>P14</b> | 5419.38  | 26              | 1.39             |

## Supporting Information

|            |          |    |      |
|------------|----------|----|------|
| <b>P15</b> | 3654.93  | 16 | 1.32 |
| <b>P16</b> | 8184.90  | 39 | 1.38 |
| <b>P17</b> | 6493.09  | 29 | 1.66 |
| <b>P18</b> | 8090.21  | 37 | 1.45 |
| <b>P19</b> | 8172.30  | 40 | 1.27 |
| <b>P20</b> | 7076.02  | 32 | 1.56 |
| <b>P21</b> | 9953.64  | 43 | -    |
| <b>P22</b> | 6880.77  | 30 | 1.26 |
| <b>P23</b> | 11571.92 | 56 | 1.21 |
| <b>P24</b> | 10975.12 | 50 | 1.28 |
| <b>P25</b> | 7370.46  | 35 | 1.82 |
| <b>P26</b> | 8333.59  | 37 | 1.36 |
| <b>P27</b> | 5906.15  | 25 | 1.49 |
| <b>P28</b> | 13886.63 | 60 | -    |

a:  $M_n$ : number average molecular weight.

b: DP: degree of polymerization, determined by  $^1\text{H}$  NMR peak integration analysis as described.

c: PDI: polydispersity, calculated by MALDI-TOF.<sup>2</sup>

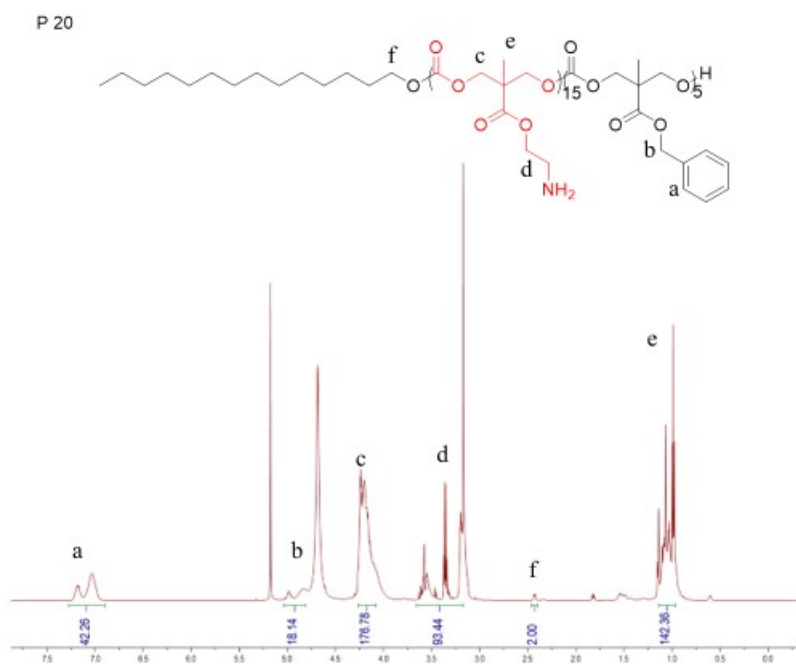

**Figure S1:**  $^1\text{H}$  NMR (600 MHz,  $\text{D}_2\text{O}$ ) spectrum of **P20**.

## Supporting Information

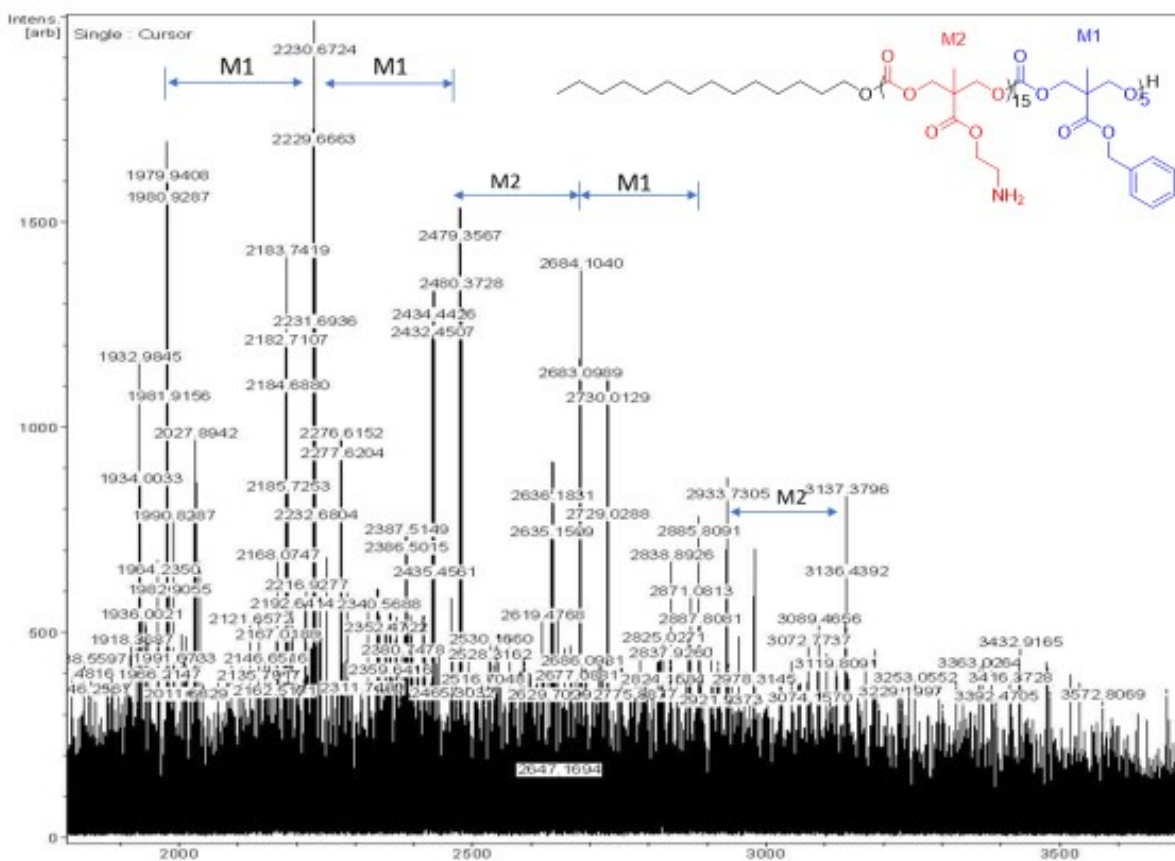

**Figure S2:** MALDI spectrum for **P20**. Mass between two nearby peaks belongs to the mass of M1 or M2.

## Supporting Information

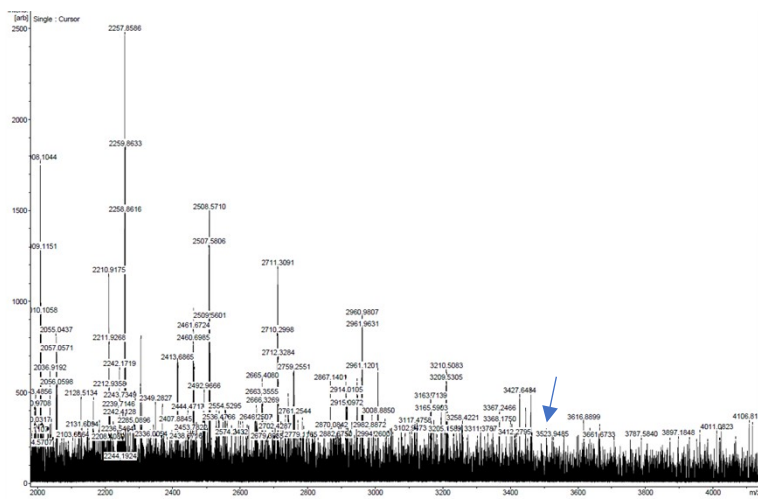

**Figure S3:** MALDI spectrum for **P7**. The expected  $m/z$  was observed from the spectrum (blue arrow).

## Supporting Information

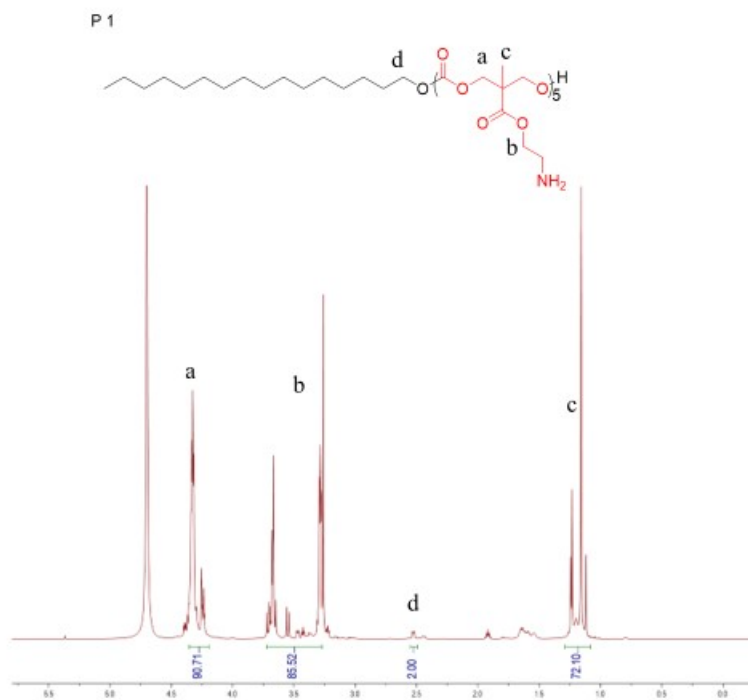

**Figure S4:** <sup>1</sup>H NMR (600 MHz, D<sub>2</sub>O) spectrum of **P1**.

## Supporting Information

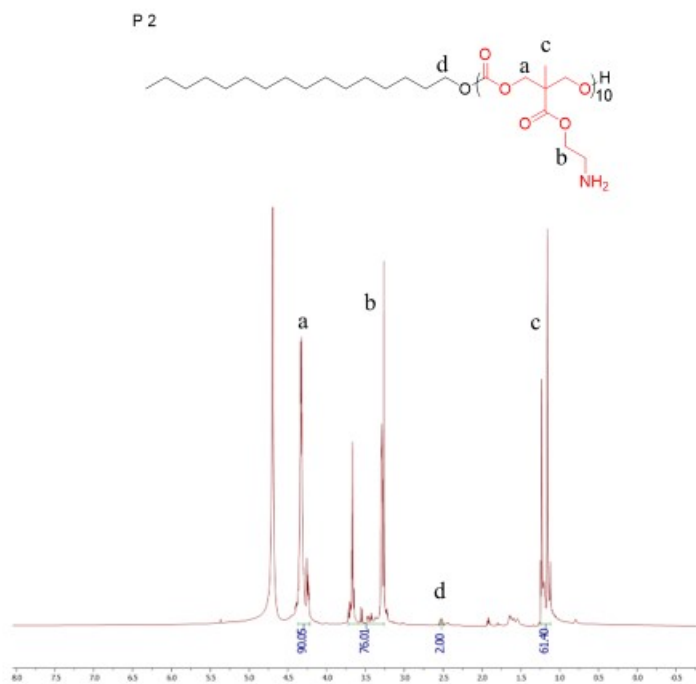

**Figure S5:**  $^1\text{H}$  NMR (600 MHz,  $\text{D}_2\text{O}$ ) spectrum of **P2**.

## Supporting Information

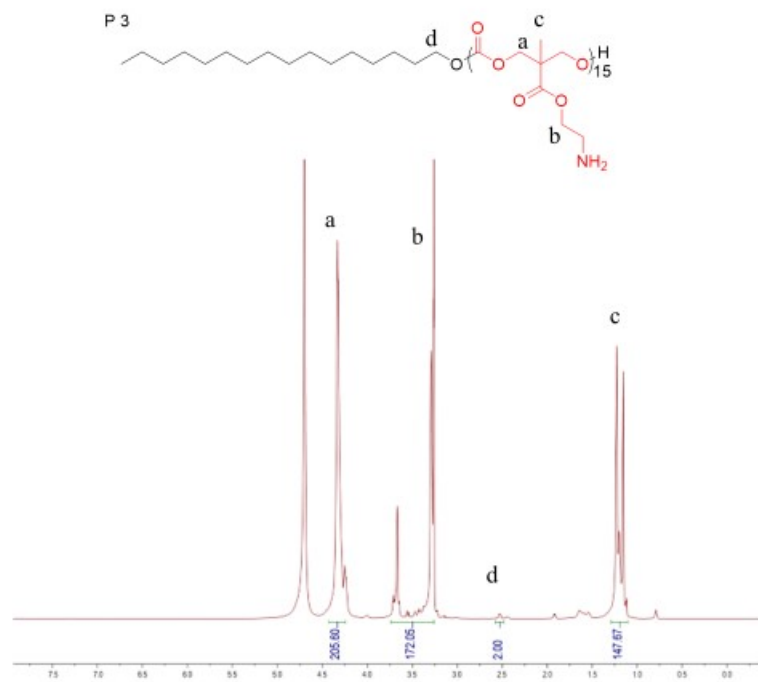

**Figure S6:**  $^1\text{H}$  NMR (600 MHz,  $\text{D}_2\text{O}$ ) spectrum of **P3**.

## Supporting Information

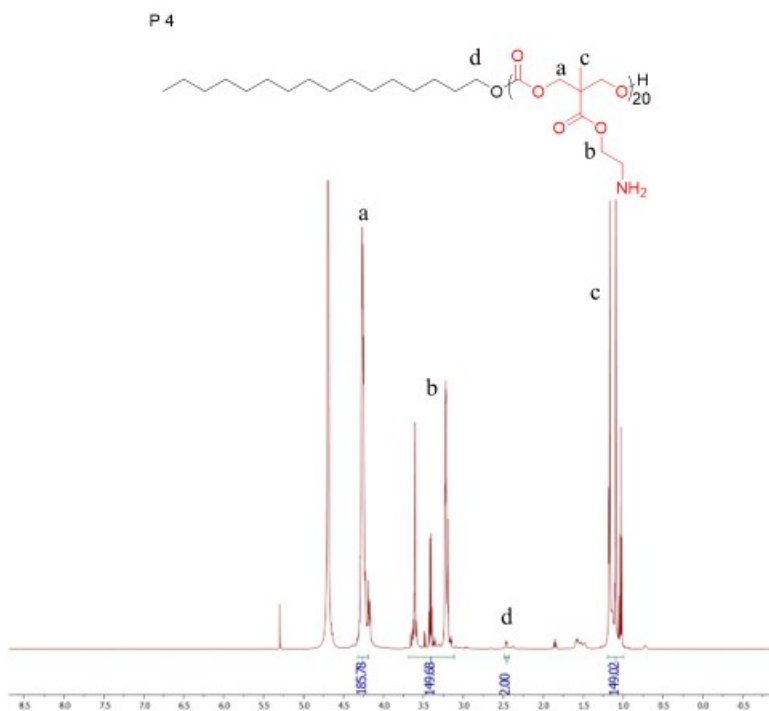

**Figure S7:** <sup>1</sup>H NMR (600 MHz, D<sub>2</sub>O) spectrum of **P4**.



## Supporting Information

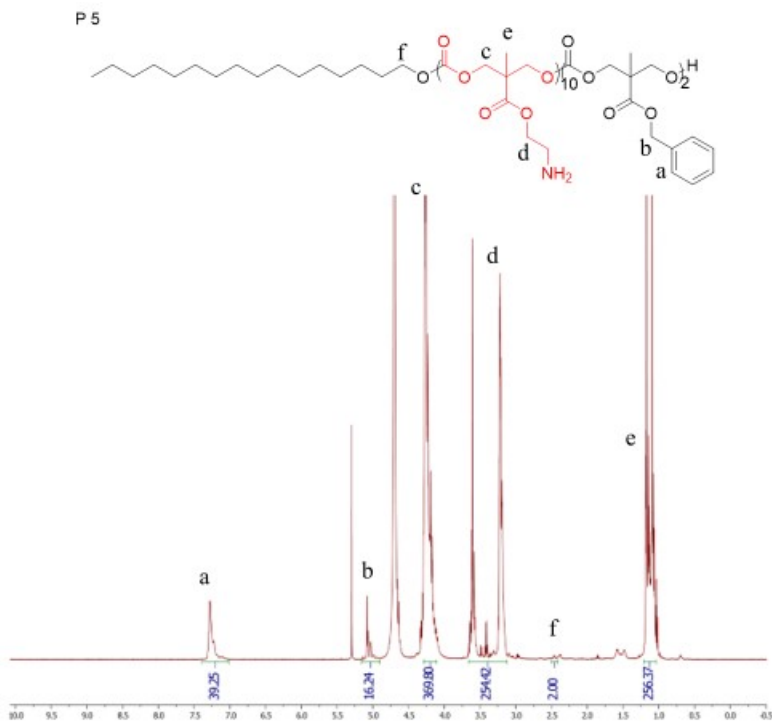

**Figure S8:**  $^1\text{H}$  NMR (600 MHz,  $\text{D}_2\text{O}$ ) spectrum of **P5**.

## Supporting Information

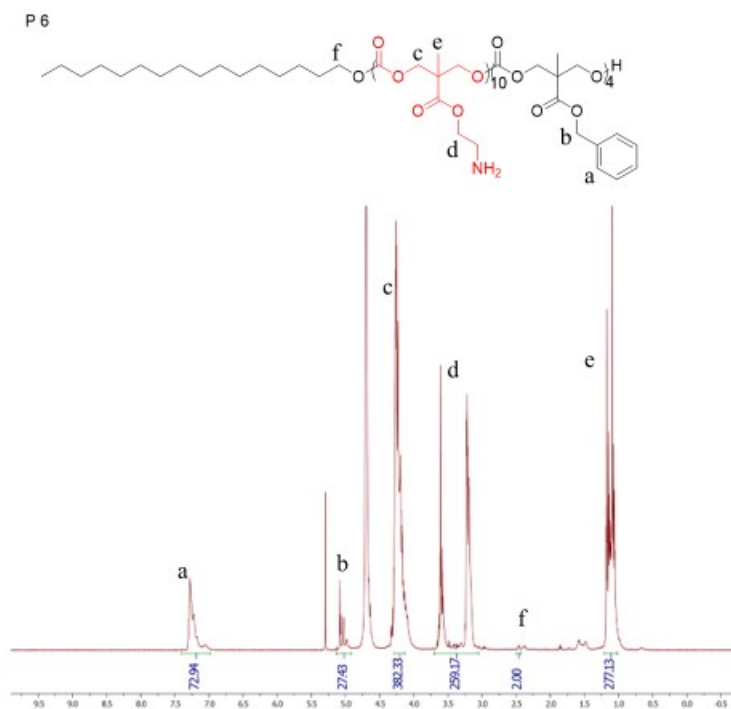

**Figure S9:**  $^1\text{H}$  NMR (600 MHz,  $\text{D}_2\text{O}$ ) spectrum of **P6**.

## Supporting Information

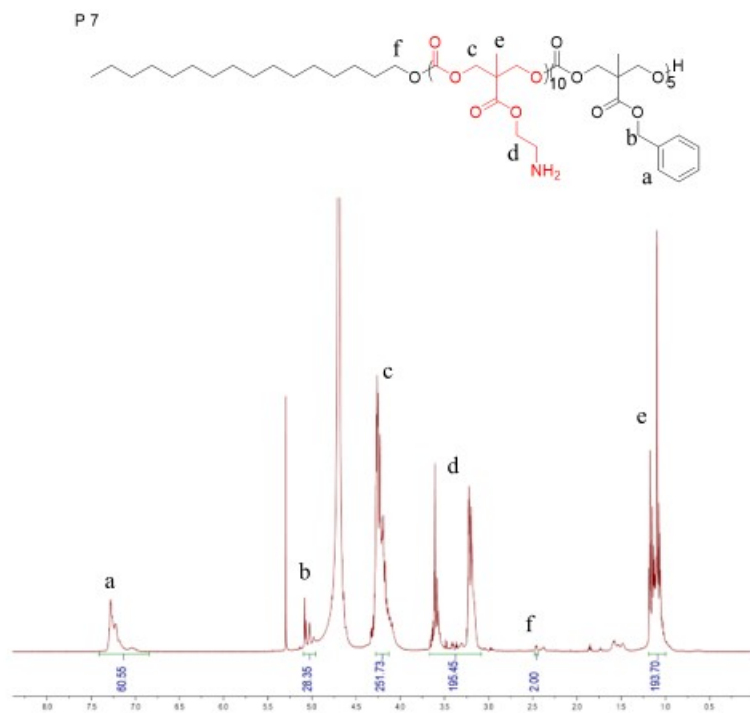

**Figure S10:**  $^1\text{H}$  NMR (600 MHz,  $\text{D}_2\text{O}$ ) spectrum of **P7**.

## Supporting Information

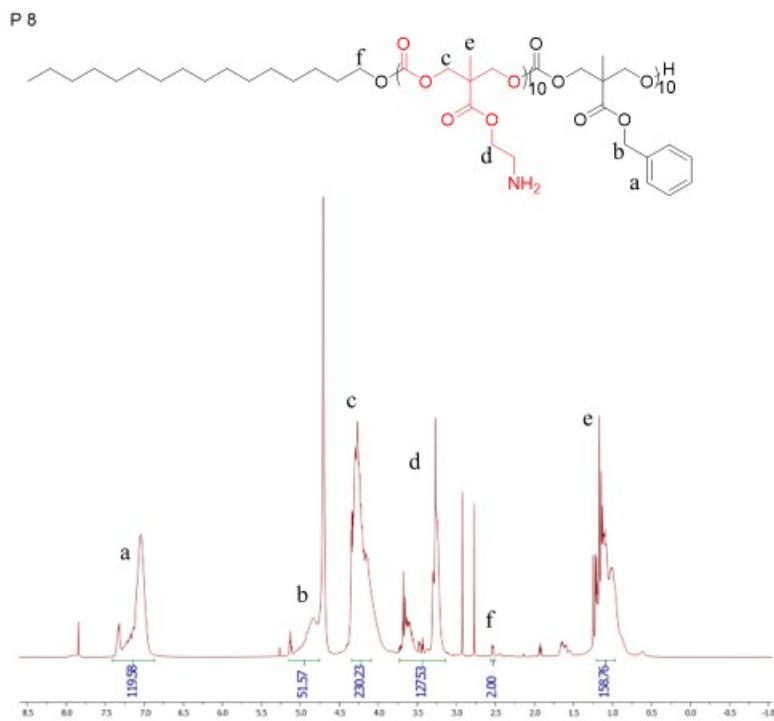

**Figure S11:**  $^1\text{H}$  NMR (600 MHz,  $\text{D}_2\text{O}$ ) spectrum of **P8**.

## Supporting Information

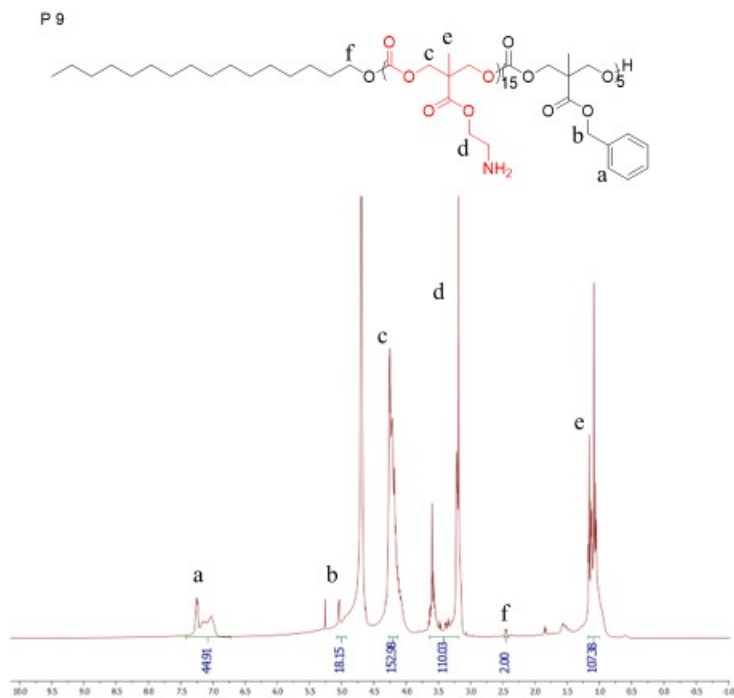

**Figure S12:**  $^1\text{H}$  NMR (600 MHz,  $\text{D}_2\text{O}$ ) spectrum of **P9**.

## Supporting Information

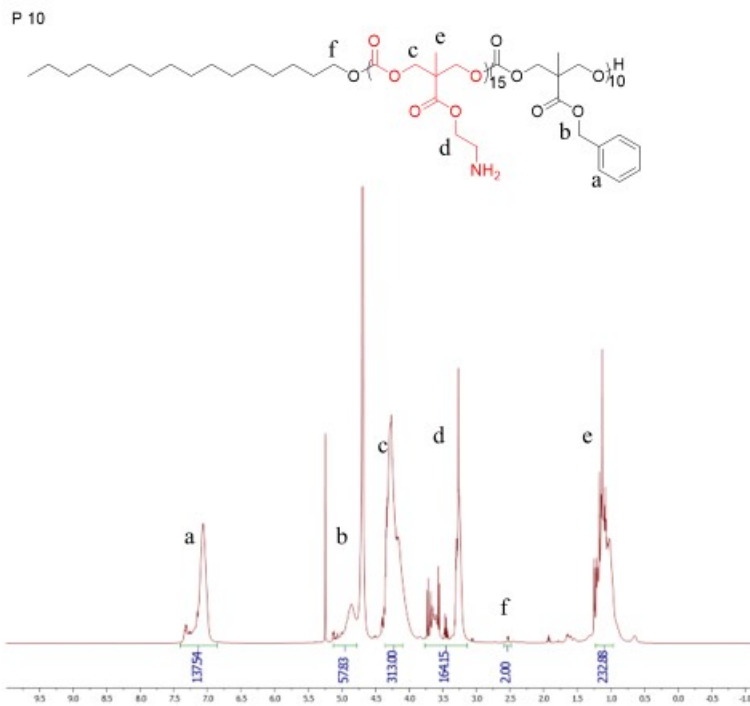

**Figure S13:**  $^1\text{H}$  NMR (600 MHz,  $\text{D}_2\text{O}$ ) spectrum of **P10**.

## Supporting Information

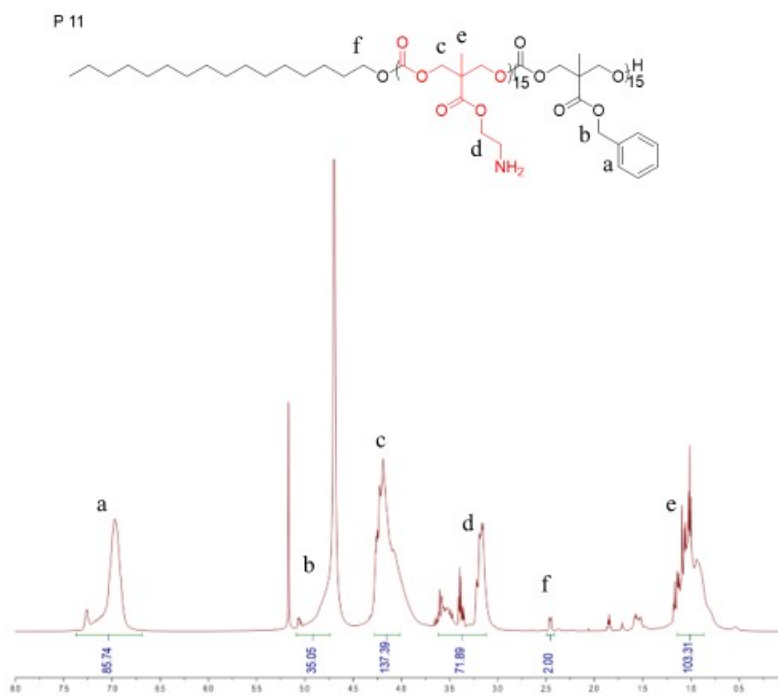

**Figure S14:**  $^1\text{H}$  NMR (600 MHz,  $\text{D}_2\text{O}$ ) spectrum of **P11**.

## Supporting Information

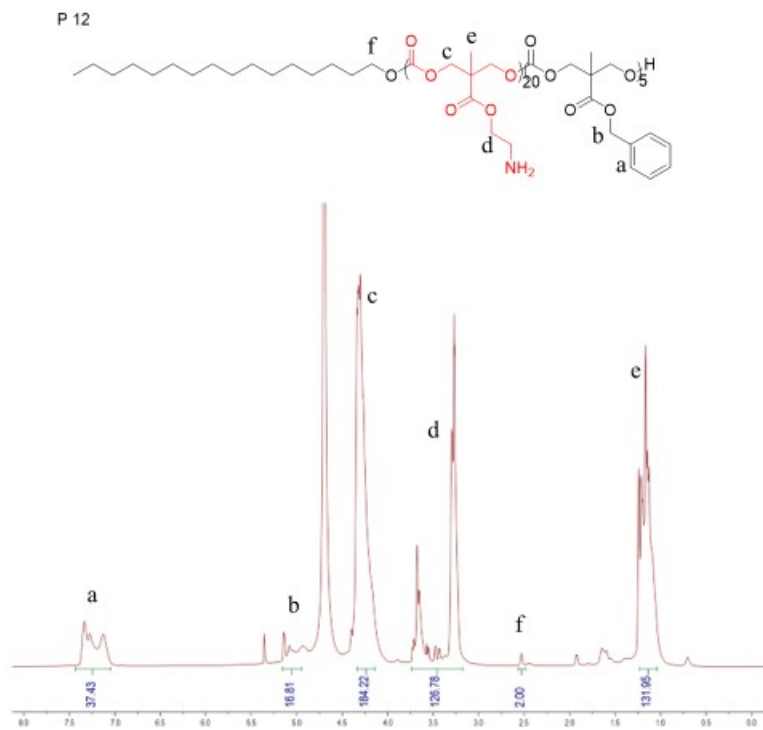

**Figure S15:**  $^1\text{H}$  NMR (600 MHz,  $\text{D}_2\text{O}$ ) spectrum of **P12**.



## Supporting Information

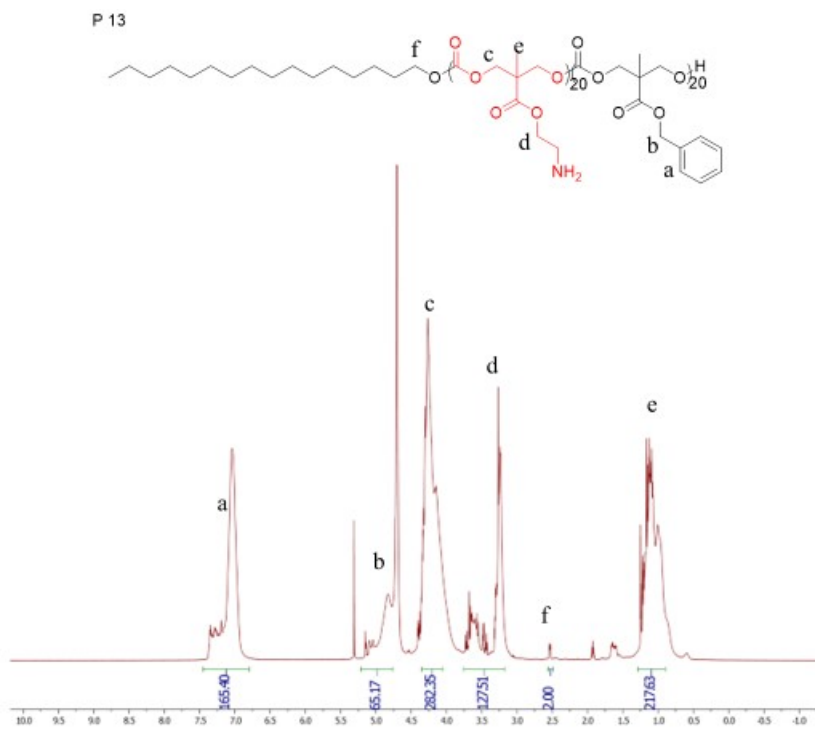

**Figure S16:** <sup>1</sup>H NMR (600 MHz, D<sub>2</sub>O) spectrum of **P13**.

## Supporting Information

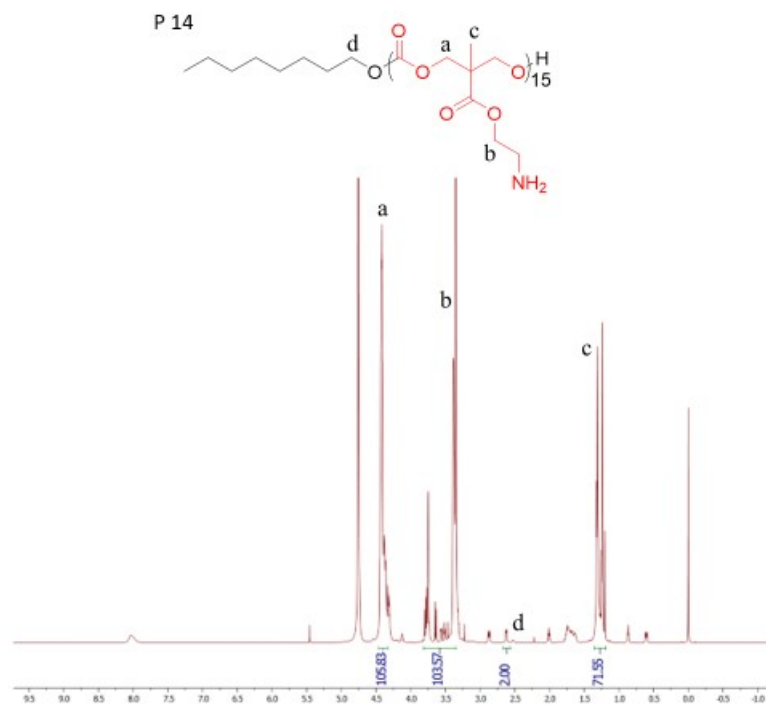

**Figure S17:** <sup>1</sup>H NMR (600 MHz, D<sub>2</sub>O) spectrum of **P14**.

## Supporting Information

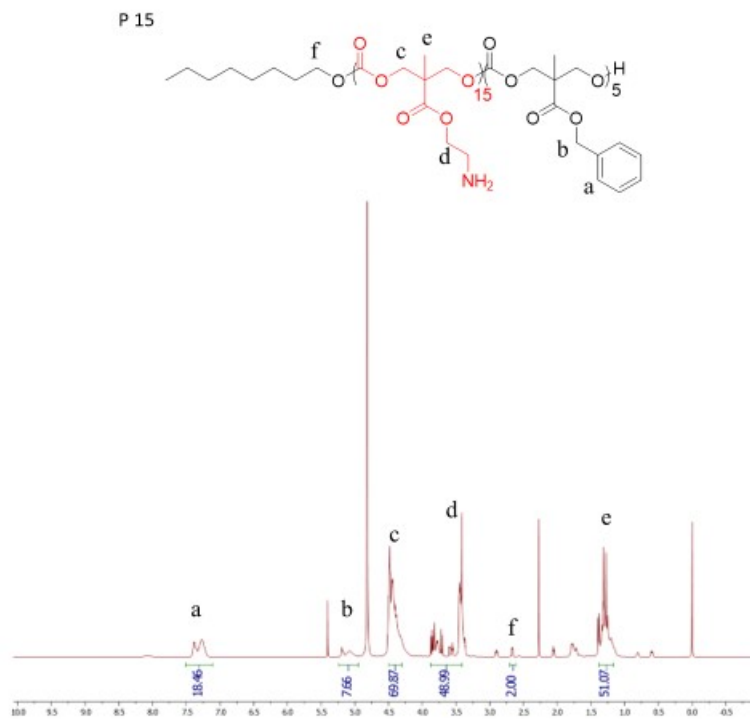

**Figure S18:**  $^1\text{H}$  NMR (600 MHz,  $\text{D}_2\text{O}$ ) spectrum of **P15**.

## Supporting Information

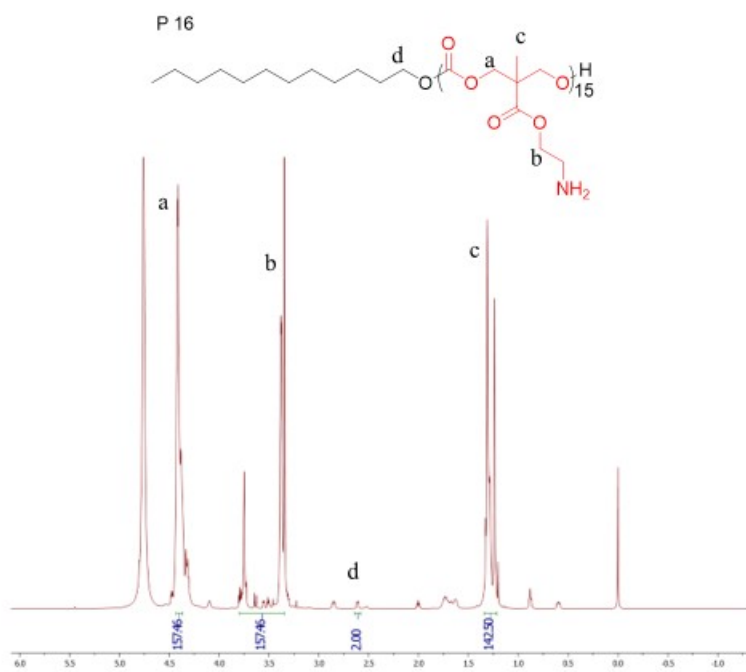

**Figure S19:**  $^1\text{H}$  NMR (600 MHz,  $\text{D}_2\text{O}$ ) spectrum of **P16**.

## Supporting Information

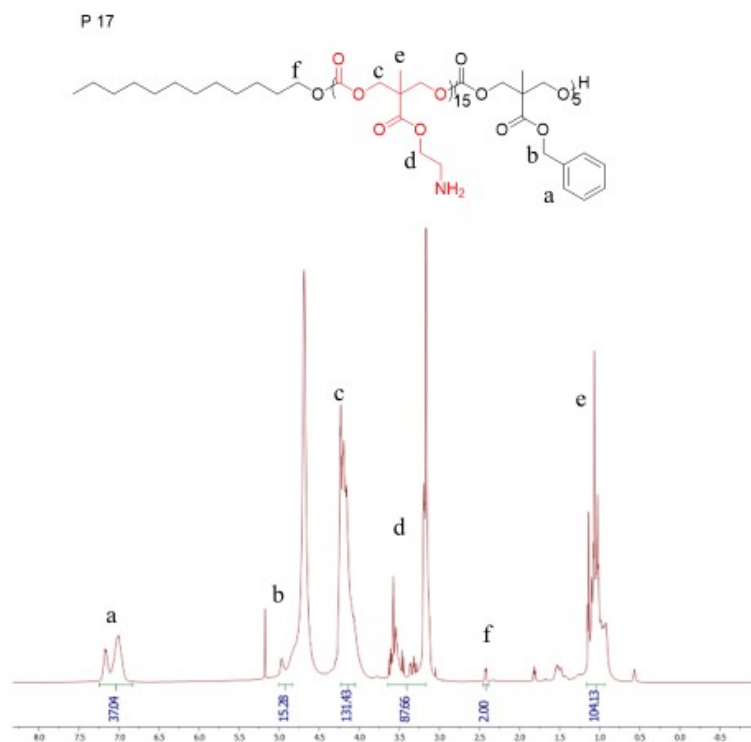

**Figure S20:**  $^1\text{H}$  NMR (600 MHz,  $\text{D}_2\text{O}$ ) spectrum of **P17**.

## Supporting Information

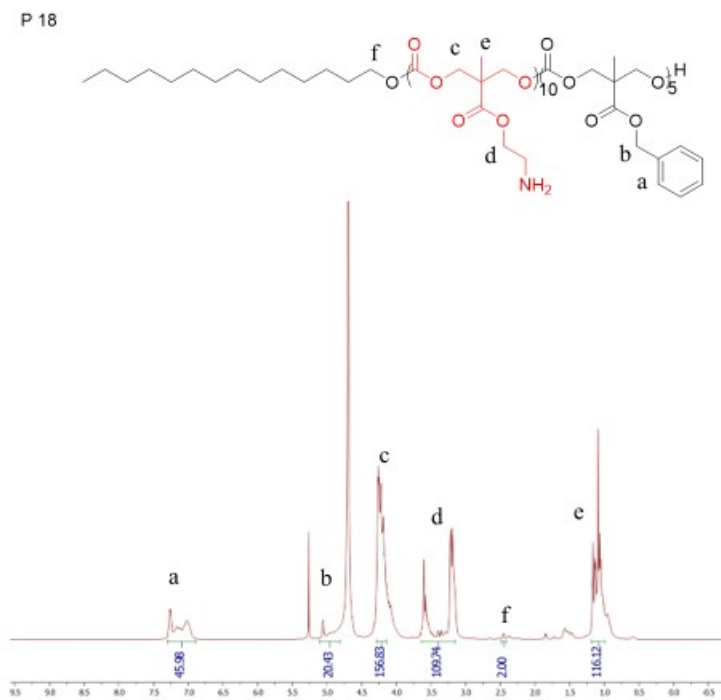

**Figure S21:**  $^1\text{H}$  NMR (600 MHz,  $\text{D}_2\text{O}$ ) spectrum of **P18**.

## Supporting Information

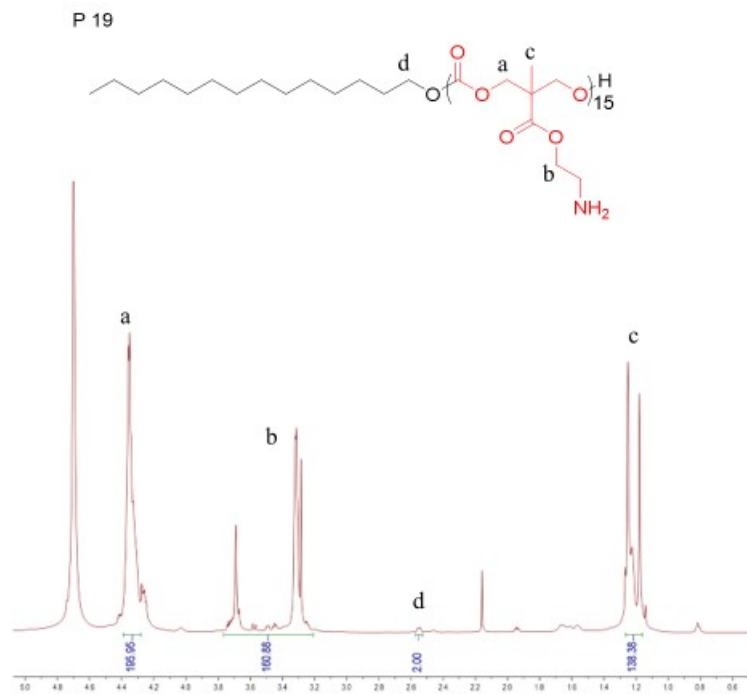

**Figure S22:**  $^1\text{H}$  NMR (600 MHz,  $\text{D}_2\text{O}$ ) spectrum of **P19**.

## Supporting Information

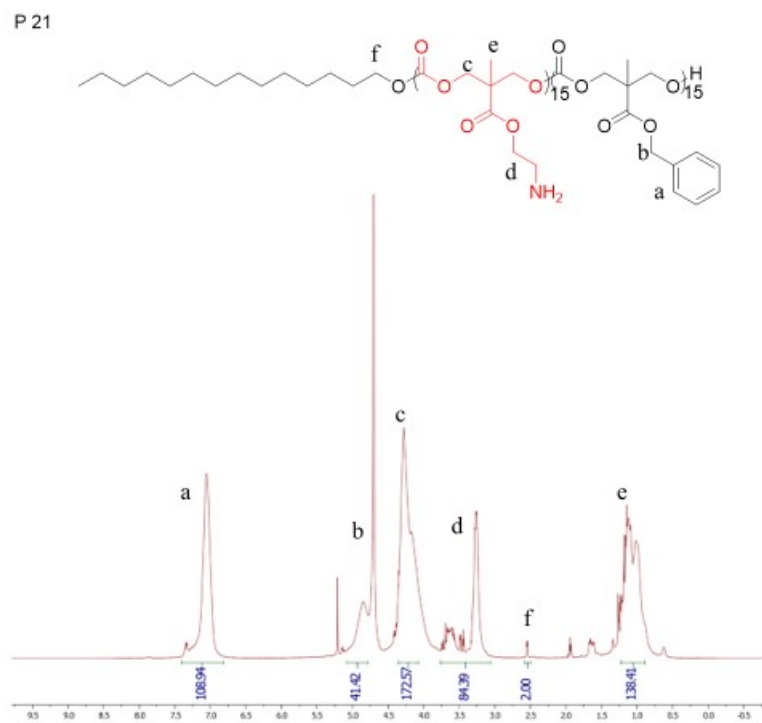

**Figure S23:**  $^1\text{H}$  NMR (600 MHz,  $\text{D}_2\text{O}$ ) spectrum of **P21**.



## Supporting Information

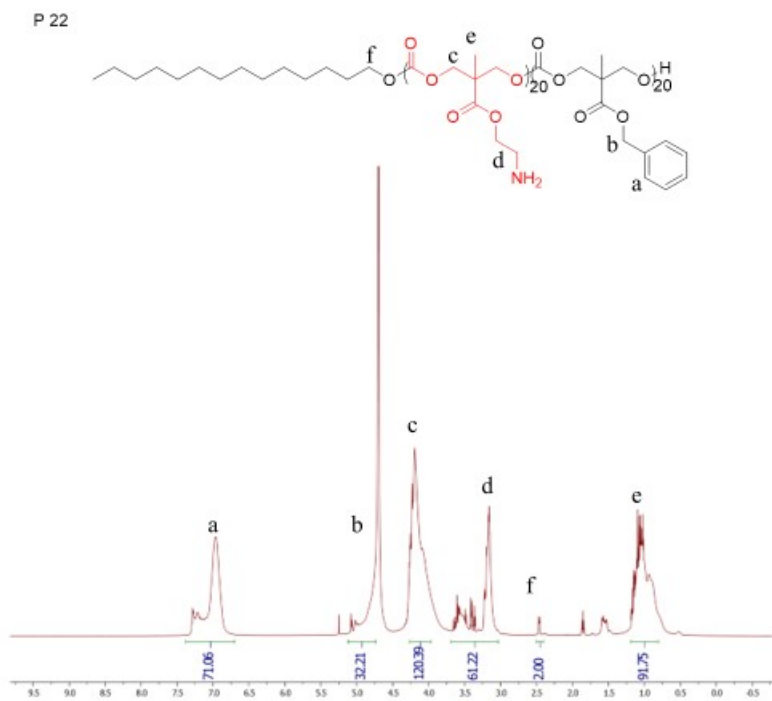

**Figure S24:**  $^1\text{H}$  NMR (600 MHz,  $\text{D}_2\text{O}$ ) spectrum of **P22**.

## Supporting Information

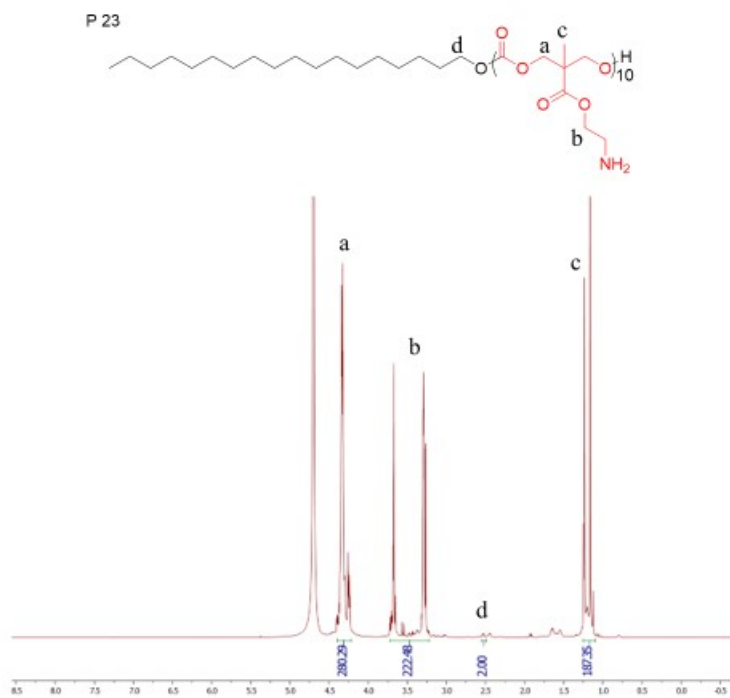

**Figure S25:**  $^1\text{H}$  NMR (600 MHz,  $\text{D}_2\text{O}$ ) spectrum of **P23**.

## Supporting Information

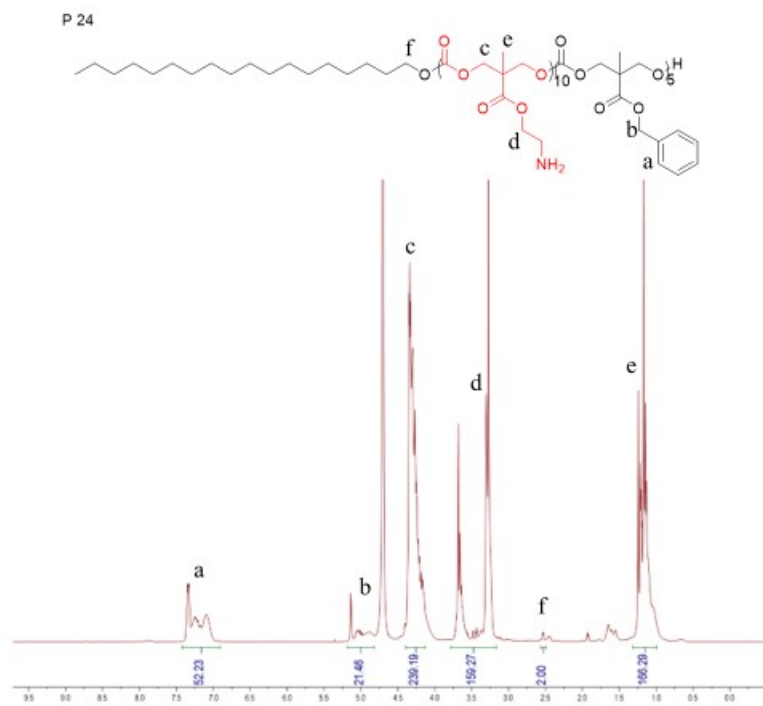

**Figure S26:**  $^1\text{H}$  NMR (600 MHz,  $\text{D}_2\text{O}$ ) spectrum of **P24**.

## Supporting Information

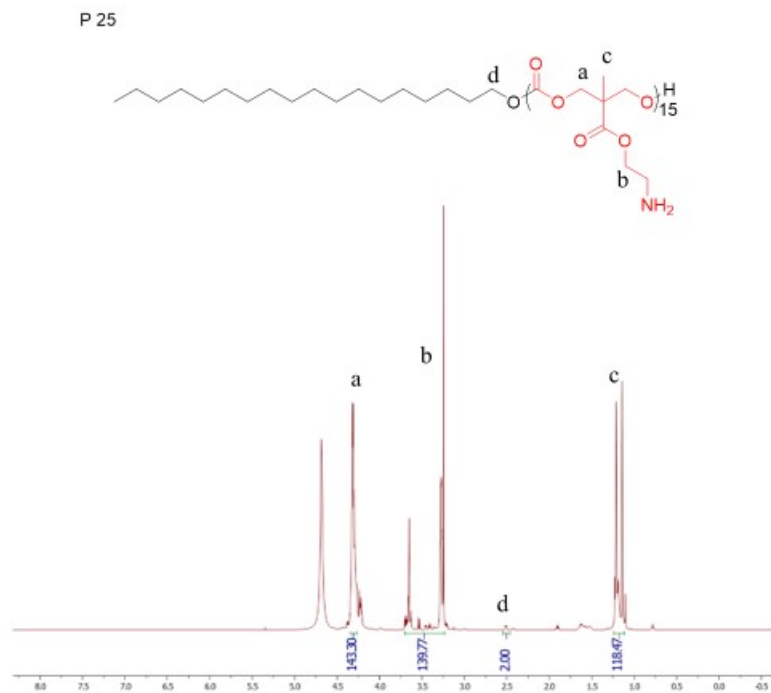

**Figure S27:** <sup>1</sup>H NMR (600 MHz, D<sub>2</sub>O) spectrum of **P25**.

## Supporting Information

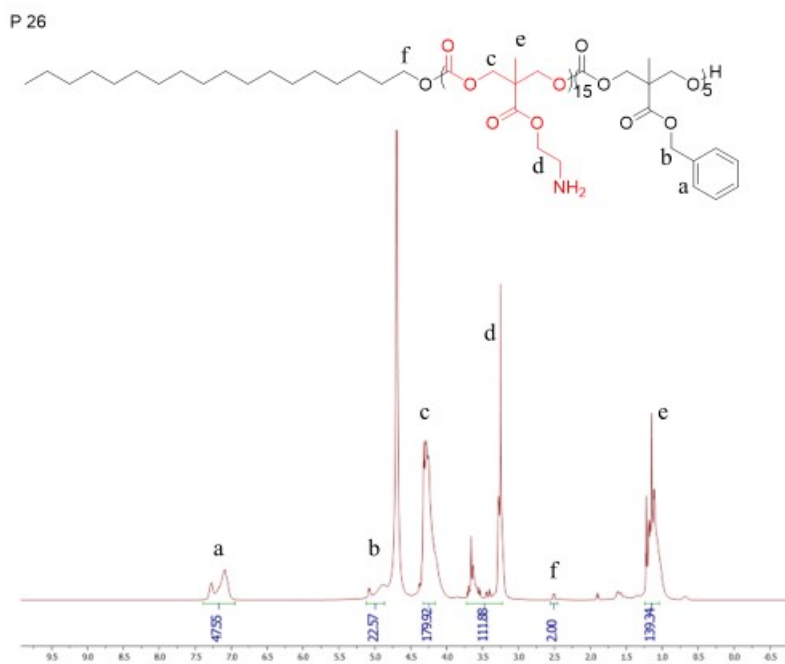

**Figure S28:**  $^1\text{H}$  NMR (600 MHz,  $\text{D}_2\text{O}$ ) spectrum of **P26**.

## Supporting Information

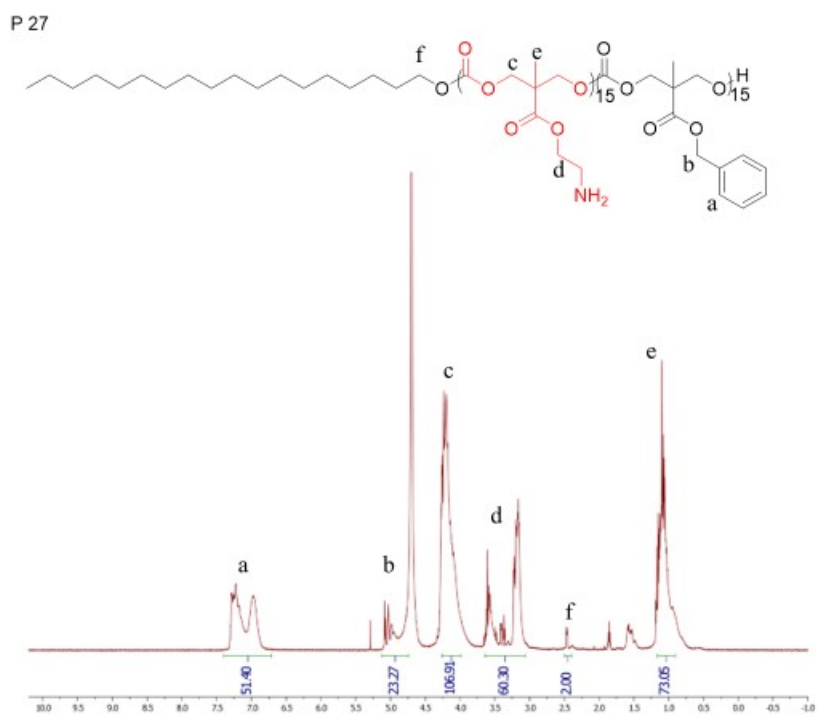

**Figure S29:**  $^1\text{H}$  NMR (600 MHz,  $\text{D}_2\text{O}$ ) spectrum of **P27**.

## Supporting Information

P 28

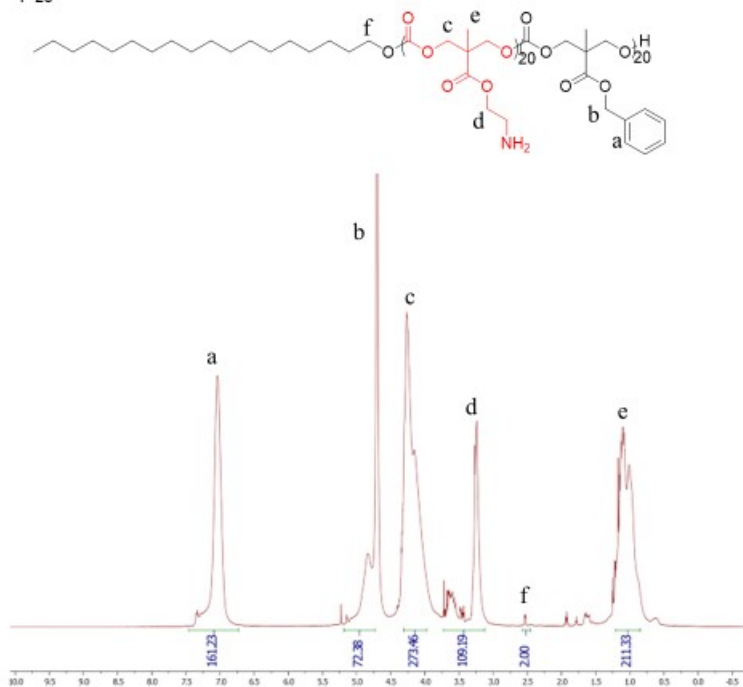

**Figure S30:** <sup>1</sup>H NMR (600 MHz, D<sub>2</sub>O) spectrum of **P28**.

### References

1. K. E. S. Locock, T. D. Michl, N. Stevens, J. D. Hayball, K. Vasilev, A. Postma, H. J. Griesser, L. Meagher and M. Haeussler, *ACS Macro Letters*, 2014, **3**, 319-323.
2. H. Räder and W. Schrepp, *Acta Polymerica*, 1998, **49**, 272-293.
